# Supplementary material
Source: PubMed Central journal article supplement (PMC11186314)
Supplement: NIHMS1992498-supplement-1.pdf [file NIHMS1992498-supplement-1.pdf]

71 patients assessed for eligibility  
(Sep2019 - Jan2022)

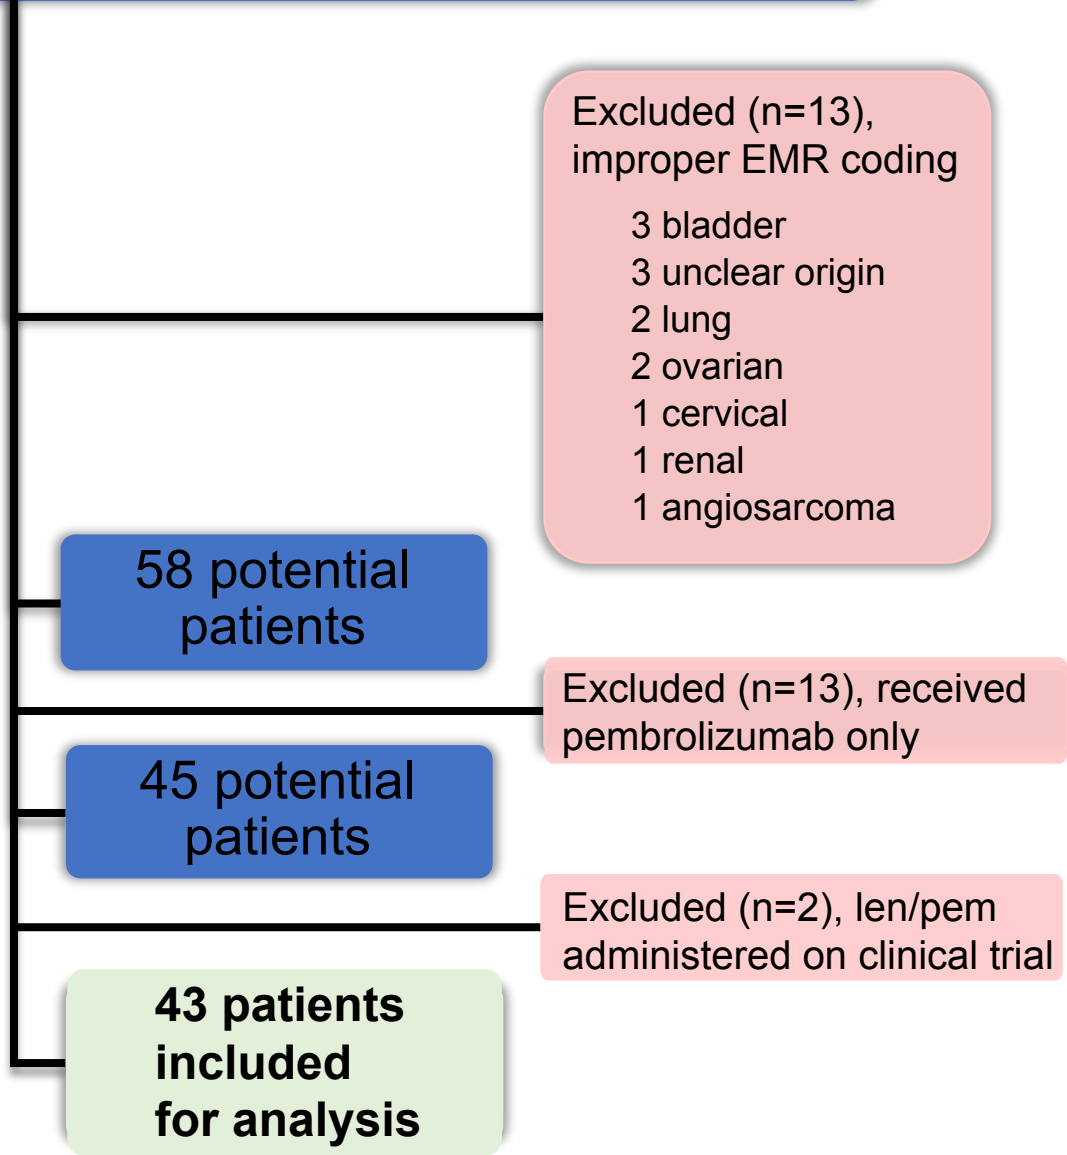

**Supplemental Fig 1:** Consolidated Standards of Reporting Trials (CONSORT) flow diagram of the study.  
*EMR: electronic medical record; len/pem: combination lenvatinib and pembrolizumab.*
