# Supplementary material
Source: PubMed Central journal article supplement (PMC11186314)
Supplement: NIHMS1992498-supplement-2.pdf [file NIHMS1992498-supplement-2.pdf]

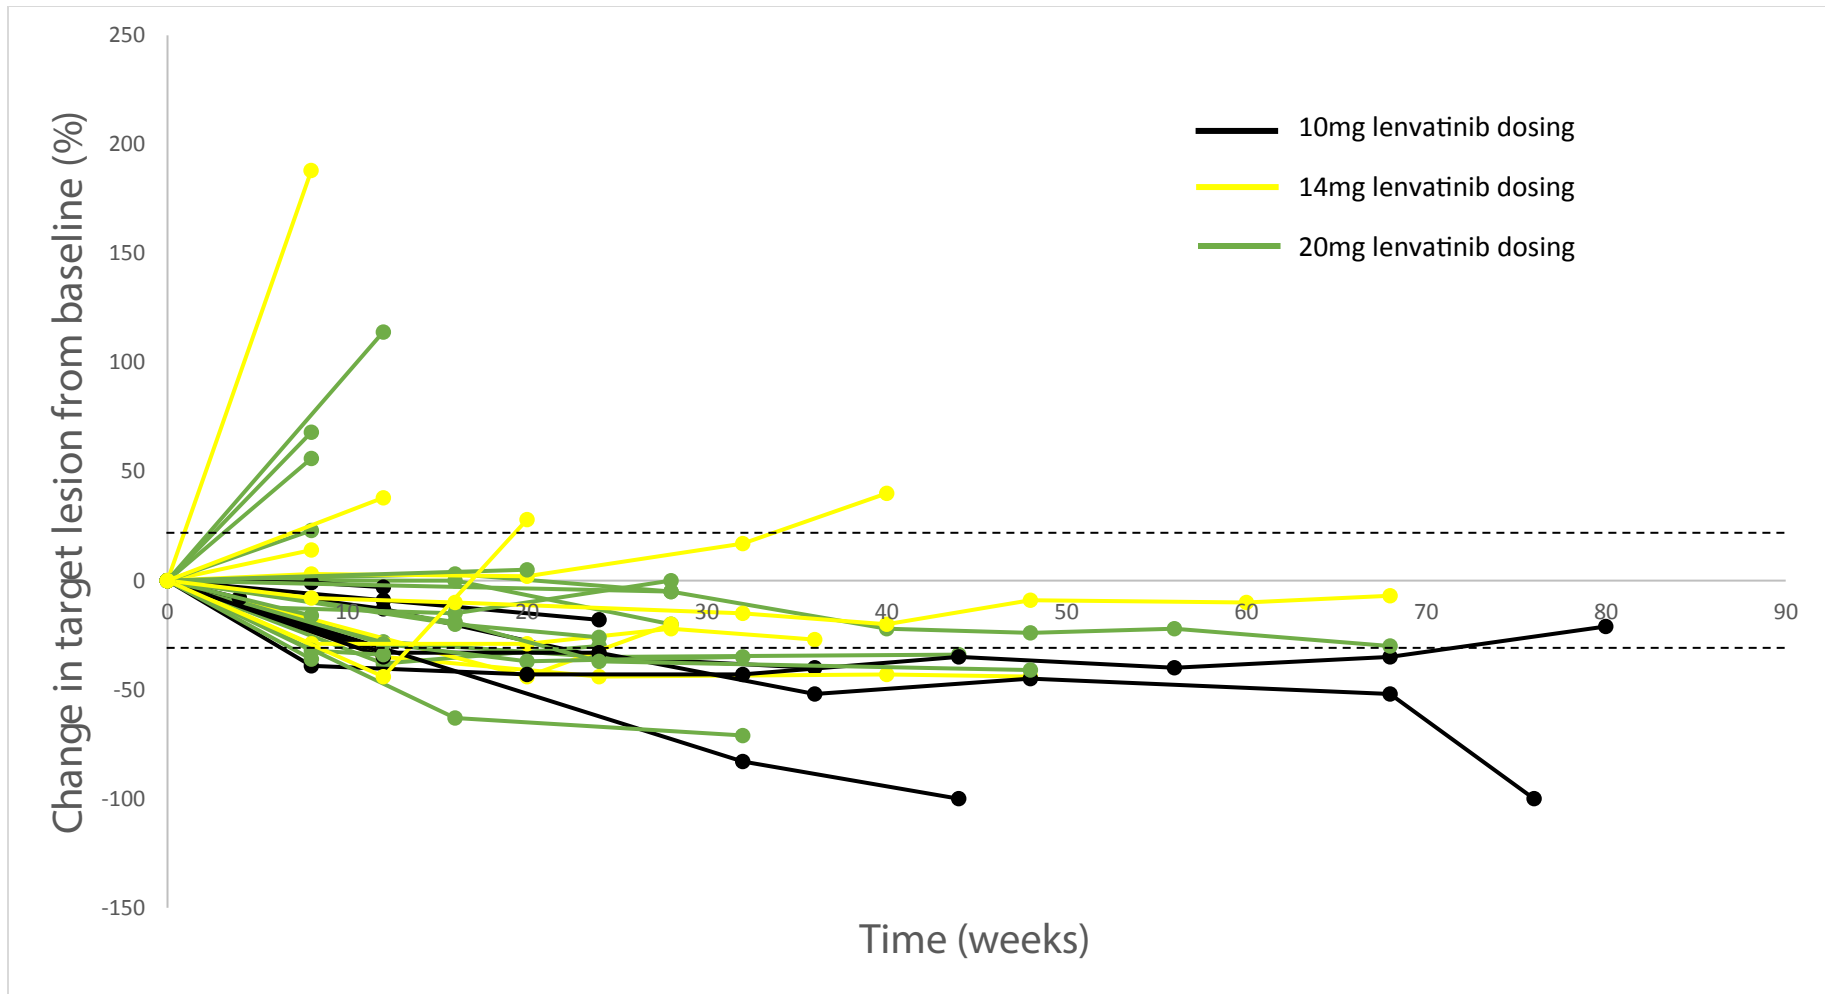

**Supplemental Fig 2:** Radiographic tumor response and duration of therapy. Each line represents one patient. The dotted line at 20% represents the cutoff for progression of disease and the dotted line at -30% represents the cutoff for partial response. Response was evaluated based on Response Evaluation in Solid Tumors version 1.1.
